# Supplementary material for: The Effects of the Mediterranean Diet on Biomarkers of Vascular Wall Inflammation and Plaque Vulnerability in Subjects with High Risk for Cardiovascular Disease. A Randomized Trial
Source: PubMed Central journal article supplement (PMC4055759; doi:10.1371/journal.pone.0100084), 2014-06-12
Supplement: pone.0100084.s001.pdf [file pone.0100084.s001.pdf]

**Table S1**

Consumption of key food items, physical activity and 14-point Mediterranean diet score.

|                             |                           | MD + EVOO (n=55)                      |                       | MD + Nuts (n=55)                   |                       | Low-fat diet (n=54)   |                       | <i>P</i> <sub>int</sub> <sup>4</sup> |
|-----------------------------|---------------------------|---------------------------------------|-----------------------|------------------------------------|-----------------------|-----------------------|-----------------------|--------------------------------------|
|                             |                           | Mean                                  | <i>P</i> <sup>3</sup> | Mean                               | <i>P</i> <sup>3</sup> | Mean                  | <i>P</i> <sup>3</sup> |                                      |
| EVOO (g/d)                  | Baseline <sup>1</sup>     | 12.1 ± 2.0                            |                       | 11.6 ± 2.0                         |                       | 9.0 ± 2.1             |                       | <0.001                               |
|                             | 1y. <sup>1</sup>          | 52.5 ± 2.0                            |                       | 10.9 ± 2.0                         |                       | 11.0 ± 2.0            |                       |                                      |
|                             | Mean changes <sup>2</sup> | 40.4 (35.9 to 45.0) <sup>a,b</sup>    | <0.001                | -0.7 (-5.3 to 3.8) <sup>b</sup>    | 0.76                  | 2.0 (-3.5 to 7.1)     | 0.34                  |                                      |
| Refined OO (g/d)            | Baseline                  | 20.5 ± 2.2                            |                       | 19.2 ± 2.2                         |                       | 25.0 ± 2.3            |                       | <0.001                               |
|                             | 1y.                       | 0.3 ± 1.9                             |                       | 26.9 ± 1.9                         |                       | 23.0 ± 2.0            |                       |                                      |
|                             | Mean changes              | -20.2 (-25.0 to -15.5) <sup>a,b</sup> | <0.001                | 7.7 (2.9 to 12.6) <sup>b</sup>     | 0.002                 | -2.0 (-7.0 to 3.0)    | 0.43                  |                                      |
| Total nuts (g/d)            | Baseline                  | 14.6 ± 2.4                            |                       | 17.9 ± 2.4                         |                       | 13.5 ± 2.4            |                       | <0.001                               |
|                             | 1y.                       | 11.8 ± 2.2                            |                       | 55.9 ± 2.2 <sup>a,b</sup>          |                       | 13.8 ± 2.1            |                       |                                      |
|                             | Mean changes              | -2.8 (-7.6 to 1.8) <sup>b</sup>       | 0.44                  | 38.0 (32.5 to 43.5) <sup>a,b</sup> | <0.001                | 0.3 (-5.1 to 5.6)     | 0.91                  |                                      |
| Vegetables (g/d)            | Baseline                  | 401 ± 19.2                            |                       | 329 ± 19.3                         |                       | 355 ± 20.5            |                       | 0.003                                |
|                             | 1y.                       | 483 ± 19.2                            |                       | 400 ± 19.2                         |                       | 363 ± 19.2            |                       |                                      |
|                             | Mean changes              | 82.6 (33.4 to 132) <sup>a</sup>       | 0.001                 | 71.5 (22.0 to 121)                 | 0.005                 | 8.3 (-44.4 to 60.9)   | 0.76                  |                                      |
| Legumes (g/d)               | Baseline                  | 18.1 ± 1.2                            |                       | 18.0 ± 1.2                         |                       | 19.6 ± 1.3            |                       | 0.17                                 |
|                             | 1y.                       | 24.6 ± 1.5                            |                       | 26.3 ± 1.5                         |                       | 18.8 ± 1.6            |                       |                                      |
|                             | Mean changes              | 6.5 (3.1 to 9.8) <sup>a</sup>         | <0.001                | 8.3 (5.0 to 11.7) <sup>a</sup>     | <0.001                | -0.8 (-4.3 to 2.7)    | 0.66                  |                                      |
| Fruits (g/d)                | Baseline                  | 455 ± 28.8                            |                       | 466 ± 26.3                         |                       | 398 ± 30.5            |                       | 0.11                                 |
|                             | 1y.                       | 567 ± 26.1                            |                       | 530 ± 28.8                         |                       | 486 ± 27.6            |                       |                                      |
|                             | Mean changes              | 112 (56.6 to 168)                     | <0.001                | 64.8 (8.8 to 121)                  | 0.02                  | 88.0 (29.2 to 147)    | 0.004                 |                                      |
| Cereals (g/d)               | Baseline                  | 299 ± 16.4                            |                       | 278 ± 16.5                         |                       | 271 ± 17.4            |                       | 0.92                                 |
|                             | 1y.                       | 233 ± 14.0                            |                       | 244 ± 14.1                         |                       | 245 ± 14.8            |                       |                                      |
|                             | Mean changes              | -66.0 (-95.9 to -36.3)                | <0.001                | -33.8 (-63.9 to -3.7)              | 0.03                  | -25.5 (-57.1 to 6.1)  | 0.11                  |                                      |
| Fish or seafood (g/d)       | Baseline                  | 101 ± 5.6                             |                       | 116 ± 5.8                          |                       | 104 ± 6.0             |                       | 0.22                                 |
|                             | 1y.                       | 114 ± 5.7                             |                       | 117 ± 5.8                          |                       | 102 ± 6.0             |                       |                                      |
|                             | Mean changes              | 12.7 (3.1 to 22.2)                    | 0.10                  | 0.4 (-9.2 to 10.1)                 | 0.93                  | -1.4 (-11.4 to 8.7)   | 0.79                  |                                      |
| Meat or meat products (g/d) | Baseline                  | 156 ± 7.8                             |                       | 163 ± 7.9                          |                       | 155 ± 8.4             |                       | 0.57                                 |
|                             | 1y.                       | 146 ± 7.4                             |                       | 147 ± 7.5                          |                       | 134 ± 8.0             |                       |                                      |
|                             | Mean changes              | -10.0 (-24.7 to 4.7)                  | 0.18                  | -16.0 (-31.1 to -1.0)              | 0.04                  | -21.2 (-37.0 to -5.4) | 0.01                  |                                      |

|                                 |              |                                  |        |                                   |        |                      |      |
|---------------------------------|--------------|----------------------------------|--------|-----------------------------------|--------|----------------------|------|
| Pastries, cakes or sweets (g/d) | Baseline     | 15.2 ± 2.4                       |        | 15.8 ± 2.5                        |        | 14.1 ± 2.6           | 0.71 |
|                                 | 1y.          | 10.5 ± 2.0                       |        | 12.7 ± 2.0                        |        | 15.8 ± 2.0           |      |
|                                 | Mean changes | -4.7 (-9.4 to 0.02)              | 0.04   | -3.1 (-7.9 to 1.7)                | 0.21   | 1.7 (-3.3 to 6.7)    | 0.50 |
| Dairy products (g/d)            | Baseline     | 387 ± 27.8                       |        | 342 ± 28.3                        |        | 375 ± 29.5           | 0.31 |
|                                 | 1y.          | 355 ± 27.4                       |        | 308 ± 27.9                        |        | 369 ± 29.1           |      |
|                                 | Mean changes | -32.1 (-88.0 to 23.7)            | 0.26   | -33.7 (-90.6 to 23.2)             | 0.25   | -6.2 (-64.7 to 52.5) | 0.84 |
| Alcohol (g/d)                   | Baseline     | 11.1 ± 2.7                       |        | 13.1 ± 2.7                        |        | 10.3 ± 2.9           | 0.58 |
|                                 | 1y.          | 9.3 ± 2.0                        |        | 12.3 ± 2.7                        |        | 9.4 ± 2.1            |      |
|                                 | Mean changes | 1.8 (-6.2 to 2.7)                | 0.44   | -0.8 (-5.3 to 3.7)                | 0.72   | -0.9 (-5.6 to 3.7)   | 0.69 |
| Wine (mL/d)                     | Baseline     | 70.3 ± 12.2                      |        | 48.2 ± 12.5                       |        | 58.9 ± 12.7          | 0.85 |
|                                 | 1y.          | 66.7 ± 12.3                      |        | 65.4 ± 12.6                       |        | 62.2 ± 12.8          |      |
|                                 | Mean changes | -3.6 (-21.8 to 14.6)             | 0.70   | 17.2 (-1.5 to 36.0)               | 0.07   | 3.3 (-14.8 to 21.8)  | 0.70 |
| Physical Activity (kcal/d)      | Baseline     | 346 ± 30.5                       |        | 286 ± 28.5                        |        | 209 ± 28.8           | 0.01 |
|                                 | 1y.          | 383 ± 37.6                       |        | 306 ± 35.1                        |        | 271 ± 35.6           |      |
|                                 | Mean changes | 36.7 (-34.5 to 108) <sup>a</sup> | 0.31   | 19.6 (-47.3 to 87.5) <sup>a</sup> | 0.56   | 61.9 (-5.5 to 129)   | 0.07 |
| MD Score                        | Baseline     | 8.3 ± 0.2                        |        | 7.9 ± 0.2                         |        | 8.5 ± 0.3            | 0.04 |
|                                 | 1y.          | 9.6 ± 0.2                        |        | 9.8 ± 0.2                         |        | 8.1 ± 0.2            |      |
|                                 | Mean changes | 1.3 (-0.1 to 2.7) <sup>a</sup>   | <0.001 | 1.9 (1.3 to 2.3) <sup>a</sup>     | <0.001 | -0.4 (-0.8 to 0.2)   | 0.15 |

Data analyzed by repeated-measures 2-factor ANOVA (simple-effect analysis by Bonferroni's multiple contrast).<sup>1</sup>Values are mean ± SD.

<sup>2</sup>Mean differences (95% CI). <sup>3</sup>P: Significant differences (P<0.05) between before and after the intervention. <sup>4</sup>Pint: comparison between measures obtained before and after intervention and among the 3 diet groups. <sup>a</sup>MD+EVOO or MD+nuts vs. low fat-diet and <sup>b</sup>MD+EVOO vs. MD+nuts are significantly different, P<0.05. EVOO, extra virgin olive oil; MD+EVOO, Mediterranean diet supplemented with extra virgin olive oil; MD+Nuts, Mediterranean diet supplemented with nuts; Refined OO, refined olive oil.
