# Supplementary material for: The Effects of the Mediterranean Diet on Biomarkers of Vascular Wall Inflammation and Plaque Vulnerability in Subjects with High Risk for Cardiovascular Disease. A Randomized Trial
Source: PubMed Central journal article supplement (PMC4055759; doi:10.1371/journal.pone.0100084), 2014-06-12
Supplement: pone.0100084.s002.pdf [file pone.0100084.s002.pdf]

**Table S2**

Changes in baseline energy and nutrient intake.

|                         |                           | MD + EVOO (n=55)               |                       | MD + Nuts (n=55)                 |                       | Low-fat diet (n=54)              |                       | <i>P</i> <sub>int</sub> <sup>4</sup> |
|-------------------------|---------------------------|--------------------------------|-----------------------|----------------------------------|-----------------------|----------------------------------|-----------------------|--------------------------------------|
|                         |                           | Mean                           | <i>P</i> <sup>3</sup> | Mean                             | <i>P</i> <sup>3</sup> | Mean                             | <i>P</i> <sup>3</sup> |                                      |
| Energy (kcal/d)         | Baseline <sup>1</sup>     | 2461 ± 87.9                    |                       | 2561 ± 87.0                      |                       | 2338 ± 87.0                      |                       | 0.02                                 |
|                         | 1y. <sup>1</sup>          | 2465 ± 75.0                    |                       | 2641 ± 74.3                      |                       | 2248 ± 74.3                      |                       |                                      |
|                         | Mean changes <sup>2</sup> | 3.5 (-129 to 136) <sup>c</sup> | 0.96                  | 79.7 (-51.0 to 211) <sup>c</sup> | 0.23                  | -89.6 (-220 to 400) <sup>c</sup> | 0.18                  |                                      |
| Protein (% E)           | Baseline                  | 16.9 ± 0.4                     |                       | 16.8 ± 0.4                       |                       | 17.5 ± 0.4                       |                       | 0.34                                 |
|                         | 1y.                       | 16.5 ± 0.3                     |                       | 16.0 ± 0.3                       |                       | 16.7 ± 0.3                       |                       |                                      |
|                         | Mean changes              | -0.4 (-1.0 to 0.2)             | 0.18                  | -0.8 (-1.4 to -0.1)              | 0.02                  | -0.8 (-1.5 to -0.2)              | 0.007                 |                                      |
| Carbohydrate (% E)      | Baseline                  | 43.3 ± 1.0                     |                       | 41.7 ± 1.0                       |                       | 43.1 ± 1.1                       |                       | 0.01                                 |
|                         | 1y.                       | 39.7 ± 0.8                     |                       | 37.2 ± 0.8                       |                       | 42.7 ± 0.8                       |                       |                                      |
|                         | Mean changes              | -3.6 (-5.4 to -1.7)            | <0.001                | -4.5 (-6.2 to -2.5) <sup>a</sup> | <0.001                | -0.4 (-2.4 to 1.6)               | 0.69                  |                                      |
| Fiber (g/d)             | Baseline                  | 29.1 ± 1.2                     |                       | 29.4 ± 1.2                       |                       | 26.6 ± 1.3                       |                       | 0.01                                 |
|                         | 1y.                       | 31.4 ± 1.1                     |                       | 32.4 ± 1.2                       |                       | 27.1 ± 1.2                       |                       |                                      |
|                         | Mean changes              | 2.3 (-0.1 to 4.8) <sup>a</sup> | 0.04                  | 3.0 (0.5 to 5.5) <sup>a</sup>    | 0.02                  | 0.5 (-2.1 to 3.1)                | 0.69                  |                                      |
| Total fat (% E)         | Baseline                  | 36.8 ± 0.9                     |                       | 38.1 ± 0.9                       |                       | 36.3 ± 0.9                       |                       | 0.001                                |
|                         | 1y.                       | 41.0 ± 0.7                     |                       | 43.5 ± 0.8                       |                       | 37.4 ± 0.8                       |                       |                                      |
|                         | Mean changes              | 4.2 (2.4 to 6.0) <sup>a</sup>  | <0.001                | 5.4 (3.6 to 7.3) <sup>a</sup>    | <0.001                | 1.1 (-0.8 to 3.0)                | 0.24                  |                                      |
| SFA (% E)               | Baseline                  | 10.1 ± 0.3                     |                       | 10.6 ± 0.3                       |                       | 9.7 ± 0.3                        |                       | 0.13                                 |
|                         | 1y.                       | 10.0 ± 0.3                     |                       | 10.5 ± 0.3                       |                       | 9.8 ± 0.3                        |                       |                                      |
|                         | Mean changes              | -0.1 (-0.8 to 0.5)             | 0.64                  | -0.1 (-0.8 to 0.5)               | 0.68                  | 0.1 (-0.5 to 0.7)                | 0.99                  |                                      |
| MUFA (% E)              | Baseline                  | 17.4 ± 0.5                     |                       | 17.6 ± 0.5                       |                       | 17.4 ± 0.5                       |                       | 0.01                                 |
|                         | 1y.                       | 21.6 ± 0.5                     |                       | 20.5 ± 0.5                       |                       | 18.0 ± 0.5                       |                       |                                      |
|                         | Mean changes              | 4.2 (3.1 to 5.4) <sup>a</sup>  | <0.001                | 2.9 (1.8 to 4.1) <sup>a</sup>    | <0.001                | 0.6 (-0.6 to 1.8)                | 0.32                  |                                      |
| ω3 PUFA (% E)           | Baseline                  | 6.3 ± 0.3                      |                       | 6.7 ± 0.3                        |                       | 6.0 ± 0.3                        |                       | <0.001                               |
|                         | 1y.                       | 6.1 ± 0.2                      |                       | 9.4 ± 0.2                        |                       | 6.2 ± 0.2                        |                       |                                      |
|                         | Mean changes              | -0.2 (-0.8 to 0.4)             | 0.60                  | 2.7 (2.1 to 3.3) <sup>a</sup>    | <0.001                | 0.2 (-0.5 to 0.8)                | 0.57                  |                                      |
| α- linolenic acid (g/d) | Baseline                  | 1.7 ± 0.1                      |                       | 2.0 ± 0.1                        |                       | 1.6 ± 0.1                        |                       | <0.001                               |
|                         | 1y.                       | 1.5 ± 0.1                      |                       | 3.0 ± 0.1                        |                       | 1.5 ± 0.1                        |                       |                                      |
|                         | Mean changes              | -0.2 (-0.5 to 0.03)            | 0.09                  | 1.0 (0.7 to 1.2) <sup>a</sup>    | <0.001                | -0.1 (-0.3 to 0.2)               | 0.87                  |                                      |

|                             |              |                                   |       |                                  |        |                                 |       |       |
|-----------------------------|--------------|-----------------------------------|-------|----------------------------------|--------|---------------------------------|-------|-------|
| Marine n3 fatty acids (g/d) | Baseline     | 0.7 ± 0.06                        |       | 0.9 ± 0.06                       |        | 0.7 ± 0.06                      |       | 0.28  |
|                             | 1y.          | 0.9 ± 0.06                        |       | 0.8 ± 0.06                       |        | 0.6 ± 0.06                      |       |       |
|                             | Mean changes | 0.2 (0.1 to 0.3)                  | 0.002 | -0.05 (-0.2 to 0.1)              | 0.36   | -0.05 (-0.2 to 0.1)             | 0.31  |       |
| Cholesterol (mg/d)          | Baseline     | 393 ± 15.0                        |       | 427 ± 15.1                       |        | 390 ± 15.8                      |       | 0.05  |
|                             | 1y.          | 376 ± 16.8                        |       | 412 ± 17.0                       |        | 355 ± 17.8                      |       |       |
|                             | Mean changes | -17.4 (-48.5 to 13.6)             | 0.27  | -14.6 (-45.9 to 16.8)            | 0.36   | -34.8 (-66.7 to -2.6)           | 0.04  |       |
| β-Carotenoids (g/d)         | Baseline     | 4.7 ± 0.4                         |       | 4.0 ± 0.4                        |        | 3.4 ± 0.4                       |       | 0.06  |
|                             | 1y.          | 5.2 ± 0.5                         |       | 4.3 ± 0.5                        |        | 3.1 ± 0.5                       |       |       |
|                             | Mean changes | 0.5 (-0.5 to 1.5) <sup>a</sup>    | 0.31  | 0.3 (-0.7 to 1.3)                | 0.56   | -0.3 (-1.3 to 0.8)              | 0.60  |       |
| Folic acid (mg/d)           | Baseline     | 473 ± 15.3                        |       | 461 ± 15.3                       |        | 445 ± 16.1                      |       | 0.01  |
|                             | 1y.          | 510 ± 15.4                        |       | 496 ± 15.4                       |        | 422 ± 16.1                      |       |       |
|                             | Mean changes | 37.0 (6.7 to 67.7) <sup>a</sup>   | 0.02  | 35.0 (4.0 to 65.0) <sup>a</sup>  | 0.03   | -23.0 (-54.5 to 9.4)            | 0.17  |       |
| Vitamin B6 (mg/d)           | Baseline     | 2.7 ± 0.07                        |       | 2.6 ± 0.07                       |        | 2.5 ± 0.08                      |       | 0.02  |
|                             | 1y.          | 2.9 ± 0.08                        |       | 2.8 ± 0.08                       |        | 2.4 ± 0.09                      |       |       |
|                             | Mean changes | 0.2 (0.02 to 0.3) <sup>a</sup>    | 0.03  | 0.2 (0.04 to 0.3) <sup>a</sup>   | 0.01   | -0.1 (-0.2 to 0.06)             | 0.22  |       |
| Vitamin B12 (mg/d)          | Baseline     | 10.1 ± 0.6                        |       | 11.3 ± 0.6                       |        | 9.8 ± 0.6                       |       | 0.10  |
|                             | 1y.          | 11.7 ± 0.7                        |       | 10.7 ± 0.7                       |        | 9.2 ± 0.7                       |       |       |
|                             | Mean changes | 1.6 (0.4 to 2.8)                  | 0.01  | -0.6 (-1.8 to 0.6)               | 0.31   | -0.6 (-2.0 to 0.6)              | 0.64  |       |
| Vitamin C (mg/d)            | Baseline     | 249 ± 12.0                        |       | 220 ± 12.0                       |        | 219 ± 12.6                      |       | 0.005 |
|                             | 1y.          | 283 ± 12.6                        |       | 237 ± 12.6                       |        | 220 ± 13.3                      |       |       |
|                             | Mean changes | 34.0 (7.9 to 60.3) <sup>a,b</sup> | 0.01  | 17.0 (-8.8 to 43.6) <sup>b</sup> | 0.20   | 0.5 (-27.0 to 28.0)             | 0.97  |       |
| Vitamin D (mg/d)            | Baseline     | 5.5 ± 0.5                         |       | 6.6 ± 0.5                        |        | 6.0 ± 0.5                       |       | 0.46  |
|                             | 1y.          | 6.9 ± 0.5                         |       | 6.4 ± 0.5                        |        | 5.7 ± 0.5                       |       |       |
|                             | Mean changes | 1.4 (0.6 to 2.2)                  | 0.001 | -0.2 (-1 to 0.6)                 | 0.58   | -0.2 (-1.1 to 0.6)              | 0.57  |       |
| Vitamin E (mg/d)            | Baseline     | 10.3 ± 0.4                        |       | 11.6 ± 0.4                       |        | 9.5 ± 0.4                       |       | 0.01  |
|                             | 1y.          | 11.3 ± 0.5                        |       | 10.2 ± 0.5                       |        | 9.3 ± 0.5                       |       |       |
|                             | Mean changes | 0.9 (0.02 to 1.9) <sup>c</sup>    | 0.04  | -1.4 (-2.3 to -0.4) <sup>c</sup> | 0.004  | -0.2 (-1.2 to 0.8) <sup>c</sup> | 0.69  |       |
| Non-heme iron (mg/d)        | Baseline     | 15.0 ± 0.5                        |       | 14.5 ± 0.5                       |        | 13.8 ± 0.6                      |       | 0.007 |
|                             | 1y.          | 16.0 ± 0.5                        |       | 15.7 ± 0.5                       |        | 13.2 ± 0.5                      |       |       |
|                             | Mean changes | 1.1 (0.03 to 2.2) <sup>a</sup>    | 0.04  | 1.2 (0.1 to 2.3) <sup>a</sup>    | 0.03   | -0.6 (-1.7 to 0.6)              | 0.34  |       |
| Heme iron (mg/d)            | Baseline     | 4.4 ± 0.2                         |       | 4.7 ± 0.2                        |        | 4.3 ± 0.2                       |       | 0.26  |
|                             | 1y.          | 4.1 ± 0.2                         |       | 4.1 ± 0.2                        |        | 3.9 ± 0.2                       |       |       |
|                             | Mean changes | -0.3 (-0.6 to 0.04)               | 0.03  | -0.6 (-0.9 to -0.3)              | <0.001 | -0.4 (-0.8 to -0.1)             | 0.006 |       |

Data analyzed by repeated-measures 2-factor ANOVA (simple-effect analysis by Bonferroni's multiple contrast).<sup>1</sup> Values are mean  $\pm$  SD.

<sup>2</sup>Mean differences (95% CI). <sup>3</sup>P: Significant differences ( $P < 0.05$ ) between before and after the intervention. <sup>4</sup>Pint: comparison between measures obtained before and after intervention and among the 3 diet groups. <sup>a</sup>MD+EVOO or MD+nuts vs. low fat-diet and <sup>b</sup>MD+EVOO

vs. MD+nuts are significantly different,  $P < 0.05$ . <sup>c</sup>All the groups differed,  $P < 0.05$ . EVOO, extra virgin olive oil; MD+EVOO,

Mediterranean diet supplemented with extra virgin olive oil; MD+Nuts, Mediterranean diet supplemented with nuts; MUFA,

MonoUnsaturated Fatty Acid; PUFA, PolyUnsaturated Fatty Acid; Refined OO, refined olive oil; SFA, Saturated Fatty Acids.
